# Supplementary material for: Effects of linear and daily undulating periodized resistance training programs on measures of muscle hypertrophy: a systematic review and meta-analysis
Source: PeerJ. 2017 Aug 22;5:e3695. doi: 10.7717/peerj.3695 (PMC5571788; doi:10.7717/peerj.3695)
Supplement: Supplemental Information 2 [file peerj-05-3695-s002.xlsx]

## Sheet: Sheet1
Broj rada	Autori	Naziv rada	Godina	Dob ispitanika	Spol	Trenažno iskustvo	Uzorak ispitanika	Tip treninga	Grupe	Podjela po grupama	Mjerenje mišićne mase	Trajanje	Frekvencija treninga	Vježbe	Trening za linearnu periodizaciju	Intervali odmora	Trening za DVP	Intervali odmora	Volumen	Rezultati LP	Razlika	Effect size	Rezultati DVP	Razlika	Effect size	Statistička značajnost	Napomene	Metoda korištena za ES
1.	Franchini et al	Influence of linear and undulating strength periodization on physical fitness, physiological, and performance responses to simulated judo matches	2015	22 +/- 2	M	Početnici	20 odraslih muškaraca	Trening s slobodnim utezima i s trenažerima	LP - 10 DUP - 10	Randomizirana	Ultrazvuk	12 tjedana	3 dana u tjednu	Čučanj, bench press itd.	Tjedan 1-4 = 3x12 Tjedan 5-8 = 3x10 Tjedan 9-12 = 3x6	2 min	Tjedan 1-12= dan 1 - 3x12 dan 2 - 3x10 dan 3 - 3x6	2 min	Izjednačen	70 +/- 2 = 71 +/- 3	1	0.50	70 +/- 2 = 71 +/- 3	1	0.5	Nema razlika	Odličan rad :)	Cohen's D
2.	Kok 2006	Comparing linear and undulating periodisation for improving and mantaining muscular strength in woman	2006	21.5 +/-5 23.1 +/-4.9	Ž	Početnici	16 žena	Trening s slobodnim utezima i s trenažerima	LP - 8 DUP - 8	Na osnovu relativne jakosti u čučnju	Ultrazvuk Desni rectus femoris Opsezi Ruka Bedro Donji dio bedra	12 tjedana	3 dana u tjednu	Squat to 110 deegres Bench press Abdominal exercise Leg press Shoulder press Back exercise Lunge Lat pulldown Heel rasies Pectoral press	Tjedan 1 = 2x15 RM Tjedan 2 = 3x12 RM Tjedan 3 = 3x10 RM Tjedan 4-6 = 3x10 RM Tjedan 7-9 = 3x6 RM Tjedan 10-12 = 3x8 RM	1-2 min	Tjedan 1 = 2x15 RM Tjedan 2 = 3x12 RM Tjedan 3 = 3x10 RM Tjedan 4-6 = Dan 1 - 3x10 RM Dan 2 - 3x6 RM Dan 3 - 3x8 RM Tjedan 7-12 = -II-	1-2 min	Izjednačen	Arm - 27.4 +/-2.2 = 27.8 +/- 2.0 Mid-Thigh - 54.4 +/- 4.6 = 55.1 +/- 4.3 Lower thigh - 48.4 +/- 3.8 = 48.6 +/- 3.6 CSA - 5.38 +/- 0.79 = 5.55 +/- 0.81	Arm = 0.4 - 1.5% Mid-Thigh = 0.7 - 1.3% Lower thigh = 0.2 - 0.4% CSA = 0.17 - 3.2%	Arm = 0.18 Mid-Thigh = 0.15 Lower thigh = 0.05 CSA = 0.22	Arm - 28.9 +/-2.8 = 29.2 +/- 2.9 Mid-Thigh - 54.6 +/- 5.7 = 55.1 +/- 5.9 Lower thigh - 48.6 +/- 5.5 = 49.1 +/- 5.4 CSA - 5.29 +/- 0.94 = 5.97 +/- 0.58	Arm = 0.3 - 1.0% Mid-Thigh = 0.5 - 0.9% Lower thigh = 0.5 - 1.0% CSA = 0.68 - 12.9%	Arm = 0.11 Mid-Thigh = 0.09 Lower thigh = 0.09 CSA = 0.72	Nema razlika		Cohen's D
3.	Prestes et al. (2009)	Comparison between linear and daily undulating periodized resistance training to increase strength.	2009	21.5 +/- 8.3	M	Utrenirani	40 muškaraca	Trening s slobodnim utezima i s trenažerima	LP - 20 DUP - 20	Randomizirana	Kaliper chest, abdominal, thigh	12 tjedana	4 dana u tjednu	18 UKUPNO - Bench press Front lat pull-down Incline bench dumbbell press Single arm dumbbell row Flat bench dumbbell fly Reverse cable crossover Standing arm curl Triceps barbell extension Alternating dumbbell arm curl Triceps pushdown Barbell wrist curl Back squat Shoulder press Leg press 45 Barbell shoulder row Leg curl Lateral raise Standing calf raise	Week 1 - 3x12 RM Week 2 - 3x10 RM Week 3 - 3x8 RM Week 4 -3x6 RM Week 5 - 3x12 RM Week 6 - 3x10 RM Week 7 - 3x8 RM Week 8 - 3x6 RM Week 9 - 3x12 RM Week 10 - 3x10 RM Week 11 - 3x8 RM Week 12 - 3x6 RM	40-1:40	Weeks 1, 3, 5, 7, 9, 11 = Days 1 and 2 - 3x12 RM Days 3 and 4 - 3x10 RM Weeks 2, 4, 6, 8, 10, 12 = Days 1 and 2 - 3x8 RM Day 3 and 4 - 3x6 RM	40-1:40	Izjednačen	66.12 +/- 2.42 =			66.61 +/- 0.45 =			Nema razlika
4.	Spineti et al. (2014)		2014	25-30	M	Početnici	53 muškaraca	Trening s slobodnim utezima i s trenažerima	DUP LTS - 11 DUP STL - 10 LP LTS - 10 LP STL - 13 Control - 9	Randomizirana	Ultrazvuk	12 tjedana	2 dana u tjednu	Bench press Lat pulldown Biceps curl Triceps extensions	Tjedan 1-4 = 2x12-15 RM Tjedan 5-8 = 3x8-10 RM Tjedan 9-12 = 4x3-5 RM	1-3 min	Weeks 1-2 = 2x12-15 RM Weeks 3-4 = 3x8-10 RM Weeks 5-6 = 4x3-5 RM Weeks 7-12 = Day 1 - 2x12-15 RM Day 2 - 3x8-10 RM Day 3 - 4x3-5 RM	1-3 min	Izjednačen	LP LTS = biceps - 36,57 +/- 6.01 = 38,70 +/- 3.91 triceps - 39,23 +/- 4.44 = 39,48 +/- 7,58 LP STL = biceps - 36,75 +/ 4,78 = 38,04 +/- 4.01 triceps - 34,43 +/- 5.74 = 37,53 +/- 4.46	LP LTS = biceps - 2.13 - 5.8% triceps - 0.25 - 0.6% LP STL = biceps - 0.29 - 0.8% triceps - 3.1 - 9.0%	LP LTS = biceps - 0.35 triceps - 0.06 LP STL = biceps - 0.06 triceps - 0.54	DUP LTS = biceps - 38,35 +/- 5.4 = 41,93 +/- 3.35 triceps - 39,76 +/- 4.93 = 41,53 +/- 4,87 DUP STL = biceps - 38,48 +/ 4,03 = 41,65 +/- 5.03 triceps - 36,51 +/- 2.13 = 39,00 +/- 3.37	DUP LTS = biceps - 3.58 - 9.3% triceps - 1.17 - 4.5% DUP STL = biceps - 3.17 - 8.2% triceps - 2.49 - 6.8%	DUP LTS = biceps - 0.67 triceps - 0.24 DUP STL = biceps - 0.79 triceps - 1.17
			0.849
				0.076

## Sheet: Sheet3
Naslov	LP - PRE	LP - SD	LP - POST	LP - SD	N	DUP - PRE	DUP - SD	DUP - POST	DUP - SD	DUP - N	Razlika LP	Postotak	Effect size	Razlika DUP	Postotak	Effect size
Ahmadizad et al. (2014) - FFM	63.7	5.7	64.9	4.6	8	61.5	6.8	62.7	4.9	8	1.2	1.88383	0.210526	1.2	1.95122	0.176471
Buford et al. (2007) - Chest girth	91.94	7.28	93.78	7.61	9	96.75	9.91	96.95	9.74	10	1.84	2.00131	0.252747	0.2	0.206718	0.0201816
Buford et al. (2007) - Thigh girth	49.44	4.65	52.72	5.4	9	51.9	4.45	53.8	5.37	10	3.28	6.6343	0.705376	1.9	3.66089	0.426966
	70.69	5.965	73.25	6.505	9	74.325	7.18	75.375	7.555	10	2.56			1.05
de Lima et al. (2012) - FFM	45.49	5.18	47.64	5.93	10	46.21	4.87	47.83	5.33	10	2.15	4.72631	0.415058	1.62	3.50573	0.332649
Foschini et al. (2010) - FFM	53.3	6	55.1	7.7	16	58.8	9.9	60.2	9.6	16	1.8	3.37711	0.3	1.4	2.38095	0.141414
Harries et al. (2016) - FFM	43.1	7	44	6.9	8	42	6.8	42.4	6.9	8	0.9	2.08817	0.128571	0.4	0.952381	0.0588235
Inoue et al. (2015) - FFM	51.6	1.8	55.7	2.5	13	57.6	2.1	59.1	2.4	12	4.1	7.94574	2.27778	1.5	2.60417	0.714286
Kok et al. (2009) - Rectus femoris cross-sectional area	5.54	0.65	6.02	0.67	10	5.01	1.01	5.75	1.05	10	0.48	8.66426	0.738462	0.74	14.7705	0.732673
	#REF!	#REF!	#REF!	#REF!		#REF!	#REF!	#REF!	#REF!		#REF!			#REF!
	5.54	0.65	6.02	0.67	10	5.01	1.01	5.75	1.05	10	0.48			0.74
Kok (2006) - Cross sectional area	5.38	0.79	5.55	0.81	8	5.29	0.94	5.97	0.58	8	0.17	3.15985	0.21519	0.68	12.8544	0.723404
	#REF!	#REF!	#REF!	#REF!		#REF!	#REF!	#REF!	#REF!		#REF!			#REF!
	5.38	0.79	5.55	0.81	8	5.29	0.94	5.97	0.58	8	0.17			0.68
Monteiro et al. (2009) - FFM	69.5	2.4	70.3	2.8	9	70.3	5.3	70.5	5.4	9	0.8	1.15108	0.333333	0.2	0.284495	0.0377358
Prestes et al. (2015) - FFM	34.9	4.53	34.35	5.83	20	36.02	3.44	36.62	3.25	19	-0.55	-1.57593	-0.121413	0.6	1.66574	0.174419
Simao et al. (2012) - Biceps thickness	36.6	6	38.7	3.9	10	38.4	5.8	41.9	3.4	9	2.1	5.7377	0.35	3.5	9.11458	0.603448
Simao et al. (2012) - Triceps thickness	39.2	4.4	39.5	7.6	10	39.8	4.9	41.5	4.9	9	0.3	0.765306	0.0681818	1.7	4.27136	0.346939
	37.9	5.2	39.1	5.75	10	39.1	5.35	41.7	4.15	9	1.2			2.6
Souza et al. (2014) - Quadriceps cross-sectional area	8689.4	770.8	9099.2	892.7	9	8616.8	1495	9064	1503.2	8	409.8	4.71609	0.531655	447.2	5.18986	0.29913
Spineti et al. (2014) LG - Biceps thickness	36.57	6.02	38.7	3.91	10	38.35	5.84	41.93	3.35	11	2.13	5.82445	0.353821	3.58	9.33507	0.613014
Spineti et al. (2014) LG - Triceps thickness	39.23	4.44	39.48	7.58	10	39.76	4.93	41.53	4.87	11	0.25	0.637267	0.0563063	1.77	4.45171	0.359026
	37.9	5.23	39.09	5.745	10	39.055	5.385	41.73	4.11	11
Spineti et al. (2014) SG - Biceps thickness	36.75	4.78	38.04	4.01	13	38.48	4.03	41.65	5.03	10	1.29	3.5102	0.269874	3.17	8.23805	0.7866
Spineti et al. (2014) SG - Triceps thickness	34.43	5.74	37.53	4.46	13	36.51	2.13	39	3.37	10	3.1	9.00378	0.54007	2.49	6.82005	1.16901
	35.59	5.26	37.785	4.235	13	37.495	3.08	40.325	4.2	10	2.195	70.2508	0.423641	2.83	92.2579	0.428677
													0.497912			0.307895
												3.90282	0.423641		5.12544	0.428677
												3.05438	0.512348		6.58985	0.316822
												0.254532			0.558462
												0.0909043			0.199451	0.358333

## Sheet: Sheet6
			LP	DUP			LP	DUP
		Ahmadizad et al. (2014)	1.9	2		Kok 2006	3.2	12.9				LP	DUP
		Buford et al. (2007)				Kok	8.7	14.8				1.9	2
		Chest	2	0.2		Souza	4.6	5.2				2	0.2
		Thigh	6.6	3.7		Simao	5.7	9.1				6.6	3.7
		de Lima et al. (2012)	4.7	3.5			0.8	4.3				4.7	3.5
		Foschini et al. (2010)	3.4	2.4		Spineti	5.8	9.3				3.4	2.4
		Harries et al. (2016)	2.1	1			3.5	8.2				2.1	1
		Inoue et al. (2015)	7.9	2.6			0.6	4.5				7.9	2.6
		Monteiro et al. (2009)	1.2	0.3			9	6.8				1.2	0.3
		Prestes et al. (2015)	-1.6	1.7			4.65556	8.34444				-1.6	1.7
		Mean ± SD	3.13333	1.93333								3.2	12.9
												8.7	14.8
			3.89444	5.13889								4.6	5.2
			0.324537	0.428241								5.7	9.1
												0.8	4.3
												5.8	9.3
												3.5	8.2
												0.6	4.5
												9	6.8
												3.89444	5.13889
												2.97153	4.23669
												0.05	0.05
												1.37275	1.95722
											Upperž	5.26719	7.09611
											Lower	2.52169	3.1

## Sheet: Sheet5
				1	0.715			FFM - only		Inoue i Foschini		Circumfrence only		Direct only		p
				2	0.807			0.413		0.682		0.822		0.148		0.728
				3	0.756
				4	0.741
				5	0.756
				6	0.742
				7	0.734
				8	0.701
				9	0.66
				10	0.772
				11	0.499
				12	0.585
				13	0.703
				14	0.599

## Sheet: Sheet4
Naslov	Tjedni	Frekvencija	Ukupno	LP	DUP
Ahmadizad et al. (2014) - FFM	8	3	32	8	8
Buford et al. (2007) - Thigh girth	9	3	28	9	10
de Lima et al. (2012) - FFM	12	4	28	10	10
Foschini et al. (2010) - FFM	14	3	32	16	16
Harries et al. (2016) - FFM	12	2	26	8	8
Inoue et al. (2015) - FFM	26	3	45	13	12
Kok et al. (2009) - Arm girth	12	3	20	10	10
Kok (2006) - Arm girth	12	3	16	8	8
Monteiro et al. (2009) - FFM	12	4	27	9	9
Prestes et al. (2015) - FFM	16	2	49	20	19
Simao et al. (2012) - Biceps thickness	12	2	30	10	11
Souza et al. (2014) - Quadriceps cross-sectional area	6	2	31	9	8
Spineti et al. (2014) SG - Triceps thickness	6	2	53	23	21
	12.0769	2.76923	417	153	150	303
	5.10656

## Sheet: Sheet2
				Tjedni		Efekt
										LP	DUP			Broj	LP	DUP
				8		0.21	0.18			1.9	2			32	8	8
				9		0.25	0.02			2	0.2			28	9	10
				6		0.7	0.43			6.6	3.7			19	10	9
				12		0.07	0.12			1.3	2.8			28	10	10
				8		0.42	0.33			4.7	3.5			13	6	7
				14		0.3	0.14			0.9				32	16	16
				12		0.1	0			1	2.3			26	8	8
				26		0.07	0.32			2.8	0.8			45	13	12
				12		0.27	0.13			1.4	-0.3			20	10	10
				12		0.16	-0.05			4.1	0.5			27	9	9
				16		0.3	0.08			-1.7	-0.5			49	20	19
				12		-0.13	-0.07			3.4	2.4			30	10	11
				6		2.3	0.71			2.1	1			31	9	8
				12		0.74	0.73			7.9	2.6			380	138	137
				12		0.33	0.03			8.7	14.8
				11.8		-0.12	0.17			1.2	0.3				275
				4.67903		0.07	0.35			-1.6	1.7
						0.35	0.6			0.8	4.3
						0.53	0.43			5.7	9.1
						0.13	0.06
						0.3525	0.2355			4.6	5.2
						0.512434	0.243039			57.8	56.4

## Sheet: postotak
				1.9	2
				2	0.2
				6.6	3.7
				1.3	2.8
				4.7	3.5
				0.9
				1	2.3
		24		2.8	0.8
		27		1.4	-0.3
		24		4.1	0.5
		48		-1.7	-0.5
		24		3.4	2.4
		42		2.1	1
		24		7.9	2.6
		78		8.7	14.8
		36		1.2	0.3
		48		-1.6	1.7
		32		0.8	4.3
		24		5.7	9.1
		12		7.8	6.6
		24		3.5	8.3
				64.5	66.1			0.0914116	0.0983631
		33.3571
		2.82688		3.07143	3.305
				0.255952	0.275417

## Sheet: Broj ljudi
			Broj	LP	DUP
			32	8	8
			28	9	10
			19	10	9
			28	10	10
			13	6	7
			32	16	16
			26	8	8
			45	13	12
			20	10	10
			27	9	9
			49	20	19
			30	10	11
			31	9	8
			29	11	10
			53	10	11
				13	10
			462	172	168
					340

## Sheet: effect size
			0.21	0.18
			0.25	0.02
			0.7	0.43
			0.07	0.12
			0.42	0.33
			0.3	0.14
			0.1	0
			0.07	0.32
			0.27	0.13
			0.16	-0.05
			0.3	0.08
			-0.13	-0.07
			2.3	0.71
			0.74	0.73
			0.33	0.03
			-0.12	0.17
			0.07	0.35
			0.35	0.6
			0.53	0.43
			0.13	0.06
			0.05	0.36
			0.74	0.79
			0.35	0.61
			1.14	1.17
			0.38875	0.318333
			0.503011	0.315824

## Sheet: sensy
			Naslov
			Ahmadizad et al. (2014) - FFM	0.797				drugi sensy		0.068
			Buford et al. (2007) - Chest girth	0.738
			Buford et al. (2007) - Thigh girth	0.716
			de Lima et al. (2012) - FFM	0.765	Foschini and Inoue
			Foschini et al. (2010) - FFM	0.769	0.393
			Franchini et al. (2015) - Calf girth	0.818
			Franchini et al. (2015) - Flexed arm girth	0.742
			Franchini et al. (2015) - Forearm girth	0.745
			Franchini et al. (2015) - Relaxed arm girth	0.83
			Franchini et al. (2015) - Thigh girth	0.723
			Franchini et al. (2015) - Thorax girth	0.772
			Harries et al. (2016) - FFM	0.778
			Inoue et al. (2015) - FFM	0.427
			Kok et al. (2009) - Arm girth	0.786
			Kok et al. (2009) - Rectus femoris cross-sectional area	0.815				0.148
			Kok et al. (2009) - Thigh girth	0.787
			Kok (2006) - Arm girth
			Kok (2006) - Cross sectional area
			Kok (2006) - Lower-thigh girth
			Kok (2006) - Mid-thigh girth
			Monteiro et al. (2009) - FFM	0.755
			Prestes et al. (2015) - FFM	0.957
			Simao et al. (2012) - Biceps thickness
			Simao et al. (2012) - Triceps thickness
			Souza et al. (2014) - Quadriceps cross-sectional area					0.062
			Spineti et al. (2014) LG - Biceps thickness
			Spineti et al. (2014) LG - Triceps thickness
			Spineti et al. (2014) SG - Biceps thickness
			Spineti et al. (2014) SG - Triceps thickness					0.039
				0.778

[truncated: 1 more sheets: Sheet7]
